# Supplementary material for: Matching estimators of causal effects in clustered observational studies
Source: publisher site journal article supplement (doi:10.1515/jci-2024-0061), 2025-01-01
Supplement: Supplementary file 1 [file jci-2024-0061_sm.pdf]

# Supplementary material

Section S1 provides necessary assumptions to establish Theorems 1 and 2. Sections S2 and S3 provide the proofs of Theorems 1, 2, and 3. Section S4 describes the proposed cluster-weighted bootstrap for the average treatment effect on the treated (ATT). Section S5 extends the matching framework to unit-level treatment assignments. Section S6 presents additional figures from the analysis of conservation policy effects on marine biodiversity.

## S1 Additional assumptions for Theorems 1 and 2

**Assumption S1.** (Conditions for  $\hat{\tau}$ )

- (i)  $\{Y_{ir}\}_{i=1, r=1}^{N, R}$  follows Model (1) that are independent between clusters but dependent within cluster.
- (ii)  $S$  is continuously distributed on a compact and convex support  $\mathbb{S}$ . The density of  $S$  is bounded and bounded away from zero on  $\mathbb{S}$ .
- (iii)  $A$  is independent of  $(Y(0), Y(1))$  conditional on  $S = s$  for almost every  $s$ . There exists a positive constant  $c$  such that  $Pr(A = 1|S = s) \in (c, 1 - c)$  for almost every  $s$ .
- (iv) For each  $a \in \{0, 1\}$ ,  $\mu(a, s)$  and  $\sigma^2(a, s)$  are Lipschitz in  $\mathbb{S}$ ,  $\sigma^2(a, s)$  is bounded away from zero on  $\mathbb{S}$  and  $E[Y^4|A = a, S = s]$  is bounded uniformly on  $\mathbb{S}$ .
- (v)  $E(K_M(i, j)^q)$  is uniformly bounded over  $N$ .

The bias-corrected estimators involve the estimation of conditional bias terms  $B_M$  and  $B_M^t$ . Following Abadie and Imbens [1], we assume the required condition for estimation on outcome mean functions in clustered data.

**Assumption S2.** (Conditions for  $\mu(s, a)$ ) Let  $\lambda = (\lambda_1, \dots, \lambda_k)'$  be a  $k$ -dimensional vector of non-negative integers,  $\partial^\lambda a(s) = \partial^{\sum_{l=1}^k \lambda_l} a(s) / \partial s_1^{\lambda_1} \dots \partial s_k^{\lambda_k}$  and  $|a(\cdot)|_m = \max_{\sum_{l=1}^k \lambda_l \leq m} \sup_{s \in \mathbb{S}} |\partial^\lambda a(s)|$ . For each  $a \in \{0, 1\}$  and  $\lambda$  satisfying  $\sum_{l=1}^k \lambda_l = k$ , the derivative  $\partial^\lambda \mu(s, a)$  exists and satisfies  $\sup_{s \in \mathbb{S}} |\partial^\lambda (\mu(s, a))| \leq C$  for some  $C > 0$ . Furthermore,  $\hat{\mu}(s, a)$  satisfies  $|\hat{\mu}(\cdot, a) - \mu(\cdot, a)|_{m-1} = o_p(N^{-1/2+1/k})$  for each  $a \in \{0, 1\}$ .

This assumption S2 guarantees a fast convergence rate on  $\hat{B}_M$  and thus contributes to establishing the remarkable result with certain regularity conditions required in Abadie and Imbens [1],

$$\sqrt{N}(\hat{B}_M - B_M) \xrightarrow{p} 0. \quad (\text{S1})$$

Assumption S2 is also necessary for the bias-corrected ATT estimator  $\hat{\tau}^t$  to ensure  $\sqrt{N}(\hat{B}_M^t - B_M^t) \xrightarrow{p} 0$  under certain conditions.

## S2 Proofs of Theorem 1 and 2

Let  $S$  be a generic variable for matching which could be at cluster-level or unit-level. The original estimator of average treatment effect (ATE) is

$$\hat{\tau}_{\text{mat}} = N^{-1} \sum_{i=1}^N \sum_{r=1}^R (2A_{ir} - 1) \left\{ 1 + \frac{1}{M} K_M(i, r) \right\} Y_{ir}.$$

According to [2], we write  $\sqrt{N}(\hat{\tau}_{\text{mat}} - B_M - \tau) = \sqrt{N}(\overline{\tau(S)} - \tau) + \sqrt{N}E_M$ , where

$$\begin{aligned} \overline{\tau(S)} - \tau &= \frac{1}{N} \sum_{i=1}^N \sum_{r=1}^R \mu_1(S_{ir}) - \mu_0(S_{ir}) - \tau, \\ E_M &= \frac{1}{N} \sum_{i=1}^N E_{M,i} = \frac{1}{N} \sum_{i=1}^N \sum_{r=1}^R (2A_r - 1) \left\{ 1 + \frac{K_M(i, r)}{M} \right\} \{Y_{ir} - \mu_{A_r}(S_{ir})\}. \end{aligned}$$

Then for the first part  $\sqrt{n}(\overline{\tau(S)} - \tau)$ , by a standard central limit theorem,

$$\sqrt{N}(\overline{\tau(S)} - \tau) \xrightarrow{d} N(0, V^{\tau(S)}).$$

Consider the distribution of  $\sqrt{N}E_M/\sqrt{V^E}$ , we adopt the results shown in [2] that the moments of  $K_M(i, r)$  are bounded uniformly in  $N$ . For a given  $S, A$ , the Lindeberg-Feller condition requires that

$$\frac{1}{NV^E} \sum_{i=1}^N \mathbb{E}[(E_{M,i}^2) \mathbb{I}\{|E_{M,i}| \geq \eta \sqrt{NV^E}\} | S, A] \rightarrow 0$$

for all  $\eta > 0$ . By the same routine, this condition holds by using Hölder's and Markov's inequalities,

$$\begin{aligned} &\mathbb{E}[(E_{M,i}^2) \mathbb{I}\{|E_{M,i}| \geq \eta \sqrt{NV^E}\} | X, A] \\ &\leq \mathbb{E}[(E_{M,i}^4 | S, A)]^{1/2} (\mathbb{E}[\mathbb{I}\{|E_{M,i}| \geq \eta \sqrt{NV^E}\} | S, A])^{1/2} \\ &\leq \mathbb{E}[(E_{M,i}^4 | S, A)]^{1/2} (\Pr(|E_{M,i}| \geq \eta \sqrt{NV^E} | S, A)) \\ &\leq \mathbb{E}[(E_{M,i}^4 | S, A)]^{1/2} \frac{\mathbb{E}[(E_{M,i})^2 | S, A]}{\eta^2 NV^E}. \end{aligned}$$

Let  $\bar{\sigma}^2 = \sup_{a,s} \sigma^2(s, a) < \infty$ ,  $\underline{\sigma}^2 = \inf_{a,s} \sigma^2(s, a) > 0$  and  $\bar{C} = \sup_{a,s} \mathbb{E}[\{Y_{ir} - \mu_{A_r}(S_{ir})\}^4 | S_{ir} = s, A_r = a] < \infty$ , then the condition is bounded as

$$\frac{1}{NV^E} \sum_{i=1}^N \mathbb{E}[(E_{M,i}^2) \mathbb{I}\{|E_{M,i}| \geq \eta \sqrt{NV^E}\} | S, A] \leq \frac{\bar{\sigma}^2 \bar{C}^{1/2}}{\eta^2 \underline{\sigma}^4 N} \left( \frac{1}{N} \sum_{i=1}^N \left( \sum_{r=1}^R (1 + M^{-1} K_M(i, r)) \right)^4 \right).$$

By central limit theorem for dependent variables [3], with finite  $V^E$ , we have

$$\sqrt{N}E_M \xrightarrow{d} N(0, V^E).$$

Therefore, the matching estimator  $\hat{\tau}_{\text{mat}}$  follows asymptotic normal distribution with finite variance  $(V^E + V^{\tau(S)})/N$ , after ignoring the conditional bias term.

For the estimator of average treatment effect on the treated (ATT),

$$\hat{\tau}_{\text{mat}}^t = \frac{1}{N_1} \sum_{i=1}^N \sum_{r=1}^R \left\{ A_r - (1 - A_r) \frac{K_M(i, r)}{M} \right\} Y_{ir},$$

where  $N_1$  is the number of units in treatment group. After ignoring the conditional bias term  $B_M^t$ ,

$$\begin{aligned} \tilde{\tau}^t &= \overline{\tau(X)}^t - B_M^t \\ &= \frac{1}{N_1} \sum_{i=1}^N \sum_{r=1}^R A_{ir} \{\mu(S_{ir}, 1) - \mu_0(S_{ir})\} + \frac{1}{N_1} \sum_{i=1}^N \sum_{r=1}^R \left\{ A_r - (1 - A_r) \frac{K_M(i, r)}{M} \right\} \{Y_{ir} - \mu_{A_r}(S_{ir})\} \end{aligned}$$

$$\begin{aligned}
&= \frac{1}{N_1} \left[ \sum_{r=1}^R A_r \{ \mu(S_{ir}, 1) - \mu_0(S_{ir}) \} + \left\{ A_r - (1 - A_r) \frac{K_M(i, r)}{M} \right\} \{ Y_{ir} - \mu_{A_r}(S_{ir}) \} \right] \\
&= \overline{\tau(S)}^t + E_M^t,
\end{aligned}$$

where

$$\begin{aligned}
\overline{\tau(S)}^t &= \frac{1}{N_1} \sum_{i=1}^N \sum_{r=1}^R A_r \{ \mu(S_{ir}, 1) - \mu_0(S_{ir}) \}, \\
E_M^t &= \frac{1}{N_1} \sum_{i=1}^N \sum_{r=1}^R \left\{ A_r - (1 - A_r) \frac{K_M(i, r)}{M} \right\} \{ Y_{ir} - \mu_{A_r}(S_{ir}) \}.
\end{aligned}$$

Consider  $\sqrt{N_1}(\hat{\tau}_{\text{mat}}^t - B_M^t - \tau^t) = \sqrt{N_1}(\overline{\tau(S)}^t - \tau^t) + \sqrt{N_1}E_M^t$ , according to the similar procedure described above, the first part  $\sqrt{N_1}(\overline{\tau(S)}^t - \tau^t) \xrightarrow{d} N(0, V^{\tau(S), t})$  by the standard central limit theorem. The second part includes

$$E_M^t = \sum_{r=1}^R \left\{ A_r - (1 - A_r) \frac{K_M(i, r)}{M} \right\} \{ Y_{ir} - \mu_{A_r}(S_{ir}) \}.$$

By the central limit theorem for dependent variables, we have

$$\sqrt{N}E_M^t \xrightarrow{d} N(0, V^{E, t}).$$

The matching estimator  $\hat{\tau}_{\text{mat}}^t$  thus follows an asymptotic normal distribution with finite variance  $(V^{E, t} + V^{\tau(S), t})/N_1$ , after ignoring the conditional bias term.

Under certain regularity conditions in [1] and the condition for outcome mean functions [4], we have  $\sqrt{N}(\hat{B}_M - B_M) \xrightarrow{p} 0$  and  $\sqrt{N}(\hat{B}_M^t - B_M^t) \xrightarrow{p} 0$ . Therefore, the above asymptotic normality and the fast convergence of estimated condition bias terms help complete the proofs for Theorem 1 and Theorem 2.

### S3 Proof of Theorem 3

For simplicity of notation, we focus on the case with balanced cluster size and reconstruct the matching estimator for convenience. Denote  $N = Rn$  as the number of observations,  $R$  as the number of balanced clusters,  $n$  as the cluster size for the each cluster, and  $S$  as a unified variable that represents either the cluster-level covariates or stacked covariates, the matching estimator is

$$\hat{\tau}_{\text{mat}} = \frac{1}{Rn} \sum_{r=1}^R \sum_{j=1}^n (2A_r - 1) \{ 1 + M^{-1}K_M(r, j) \} Y_{rj}.$$

The matching estimator can be decomposed into three parts,  $\hat{\tau}_{\text{mat}} = \overline{\tau(S)} + E_M + B_M$ , where

$$\begin{aligned}
\overline{\tau(X, Z)} &= \frac{1}{Rn} \sum_{r=1}^R \sum_{j=1}^n \{ \mu_1(S_{rj}) - \mu_0(S_{rj}) \}, \\
E_M &= \frac{1}{Rn} \sum_{r=1}^R \sum_{j=1}^n (2A_r - 1) \left\{ 1 + \frac{K_M(r, j)}{M} \right\} \{ Y_{rj} - \mu_{A_r}(S_{rj}) \}, \\
B_M &= \frac{1}{Rn} \sum_{r=1}^R \sum_{j=1}^n (2A_r - 1) \left[ \frac{1}{M} \sum_{(k, l) \in \mathcal{J}_M(r, j)} \{ \mu_{1-A_r}(S_{rj}) - \mu_{1-A_r}(S_{kl}) \} \right].
\end{aligned}$$

The debiased estimator for cluster weighted bootstrap is expressed as

$$\begin{aligned}\tilde{\tau} &= \hat{\tau}_{\text{mat}} - \hat{B}_M \\ &= \frac{1}{Rn} \sum_{r=1}^R \sum_{j=1}^n \{\hat{\mu}_1(S_{rj}) - \hat{\mu}_0(S_{rj})\} + \frac{1}{Rn} \sum_{r=1}^R \sum_{j=1}^n (2A_r - 1)\{1 + M^{-1}K_M(r, j)\}\{Y_{rj} - \hat{\mu}_{A_r}(S_{rj})\} \\ &= \frac{1}{Rn} \sum_{r=1}^R \sum_{j=1}^n [\{\hat{\mu}_1(S_{rj}) - \hat{\mu}_0(S_{rj})\} + (2A_r - 1)\{1 + M^{-1}K_M(r, j)\}\{Y_{rj} - \hat{\mu}_{A_r}(S_{rj})\}] \\ &= \frac{1}{R} \sum_{r=1}^R \tilde{\tau}_r,\end{aligned}$$

where  $\tilde{\tau}_r = \frac{1}{n} \sum_{j=1}^n [\{\hat{\mu}_1(S_{rj}) - \hat{\mu}_0(S_{rj})\} + (2A_r - 1)\{1 + M^{-1}K_M(r, j)\}\{Y_{rj} - \hat{\mu}_{A_r}(S_{rj})\}]$ .

Let  $\hat{e}_{rj} = Y_{rj} - \hat{\mu}_{A_r}(S_{rj})$ ,  $\hat{\xi}_{rj} = (2A_r - 1)\{\hat{\mu}(A_r, S_{rj}) - \hat{\mu}(1 - A_r, S_{rj})\} - \tilde{\tau}$ , then

$$\tilde{\tau}_r - \tilde{\tau} = \frac{1}{n} \sum_{j=1}^n [(2A_r - 1)\{1 + M^{-1}K_M(r, j)\}\hat{e}_{rj} + \hat{\xi}_{rj}].$$

To show that the cluster weighted bootstrap is a valid approach for statistical inference, we need to show the consistency of cluster weighted bootstrap variance, i.e.,

$$E \left[ \left\{ \sum_{r=1}^R W_r^* (\tilde{\tau}_r - \tilde{\tau}) |(\mathbf{Y}, \mathbf{A}, \mathbf{S}) \right\}^2 \right] \xrightarrow{P} \sigma^2,$$

where  $W_r^* = M_r^*/\sqrt{R}$ , and  $(M_1^*, \dots, M_R^*)$  is required to satisfy Assumption S3, e.g., it could be a vector from a multinomial distribution with equal probability. The proof follows the same strategy as Otsu and Rai [4], adjusting for the clustered case.

**Assumption S3.** (Conditions for  $W_r^*$ )

- (i)  $(W_1^*, \dots, W_R^*)$  is exchangeable and independent of  $\mathbf{Z} = (\mathbf{Y}, \mathbf{A}, \mathbf{S})$ .
- (ii)  $\sum_{r=1}^R (W_r^* - \bar{W}^*)^2 \xrightarrow{P} 1$  where  $\bar{W}^* = R^{-1} \sum_{r=1}^R W_r^*$ .
- (iii)  $\max_{1, \dots, R} |W_r^* - \bar{W}^*| \xrightarrow{P} 0$ .
- (iv)  $E[W_r^{*2}] = O(R^{-1})$  for all  $r = 1, \dots, R$ .

Consider  $\sqrt{R}T^* = \sum_{r=1}^R (W_r^* - \bar{W}^*)(\tilde{\tau}_r - \tilde{\tau})$ , it can be decomposed into three parts,

$$\begin{aligned}\sqrt{R}T^* &= \sum_{r=1}^R (W_r^* - \bar{W}^*)(\tilde{\tau}_r - \tilde{\tau}) \\ &= \sum_{r=1}^R (W_r^* - \bar{W}^*) \left[ \frac{1}{n} \sum_{j=1}^n \{(2A_r - 1)\{1 + M^{-1}K_M(r, j)\}\hat{e}_{rj} + \hat{\xi}_{rj}\} \right] \\ &= \sqrt{R}(T_N^* + R_{1N}^* + R_{2N}^*),\end{aligned}$$

where

$$\begin{aligned}\sqrt{R}T_N^* &= \sum_{r=1}^R (W_r^* - \bar{W}^*) \left[ \frac{1}{n} \sum_{j=1}^n \{(2A_r - 1)\{1 + M^{-1}K_M(r, j)\}e_{rj} + \xi_{rj}\} \right], \\ \sqrt{R}R_{1N}^* &= \sum_{r=1}^R (W_r^* - \bar{W}^*) \left[ \frac{1}{n} \sum_{j=1}^n (2A_r - 1)\{1 + M^{-1}K_M(r, j)\}\{\mu(A_r, S_{rj}) - \hat{\mu}(A_r, S_{rj})\} \right], \\ \sqrt{R}R_{2N}^* &= \sum_{r=1}^R (W_r^* - \bar{W}^*) \left[ \frac{1}{n} \sum_{j=1}^n (\hat{\xi}_{rj} - \xi_{rj}) \right].\end{aligned}$$

We need to show that  $\Pr\{\sqrt{R}|R_{1N}^*| > \varepsilon\} \xrightarrow{P} 0$ ,  $\Pr\{\sqrt{R}|R_{2N}^*| > \varepsilon\} \xrightarrow{P} 0$ , and  $E[(\sqrt{R}T_N^*)^2] \xrightarrow{P} \sigma^2$ .

For  $\sqrt{R}R_{1N}^*$ , the Markov's inequality is leveraged to show its convergence toward 0 as  $R \rightarrow \infty$ .

$$\begin{aligned} E[(\sqrt{R}R_{1N}^*)^2] &= E\left[\sum_{r=1}^R (W_r^* - \bar{W}^*)\gamma_r\right]^2 \\ &= RE[(W_1^* - \bar{W}^*)^2] \frac{1}{R} \sum_{r=1}^R \gamma_r^2 + R(R-1)E[(W_1^* - \bar{W}^*)(W_2^* - \bar{W}^*)] \times \frac{1}{R(R-1)} \sum_{i \neq k} \gamma_i \gamma_k \end{aligned}$$

where  $\gamma_r = \frac{1}{n} \sum_{j=1}^n (2A_r - 1)\{1 + M^{-1}K_M(r, j)\}\{\mu(A_r, S_{rj}) - \hat{\mu}(A_r, S_{rj})\}$ . Since  $RE[(W_1^* - \bar{W}^*)^2] = O(1)$ ,  $R(R-1)E[(W_1^* - \bar{W}^*)(W_2^* - \bar{W}^*)] = O(1)$ ,  $|\mu(a, \cdot) - \hat{\mu}(a, \cdot)|_{k-1} = o_p(N^{-1/2+1/k})$ , and  $E(K_M(i, j)^q)$  is uniformly bounded over  $N$ , we obtain  $E[(\sqrt{R}R_{1N}^*)^2] \xrightarrow{p} 0$ . Then the Markov inequality shows that  $\Pr[\sqrt{R}|R_{1N}^*| > \varepsilon] \xrightarrow{p} 0$ .

Similarly,  $\Pr[\sqrt{R}|R_{2N}^*| > \varepsilon] \xrightarrow{p} 0$  by Markov inequality, since

$$\begin{aligned} E[(\sqrt{R}R_{2N}^*)^2] &= E\left[\sum_{r=1}^R (W_r^* - \bar{W}^*)\left\{\frac{1}{n} \sum_{j=1}^n (\hat{\xi}_{rj} - \xi_{rj})\right\}\right]^2 \\ &= RE[(W_1^* - \bar{W}^*)^2] \frac{1}{R} \sum_{r=1}^R \left\{\frac{1}{n} \sum_{j=1}^n (\hat{\xi}_{rj} - \xi_{rj})\right\}^2 + R(R-1)E[(W_1^* - \bar{W}^*)(W_2^* - \bar{W}^*)] \\ &\quad \times \frac{1}{R(R-1)} \sum_{i \neq k} \left\{\frac{1}{n} \sum_{j=1}^n (\hat{\xi}_{rj} - \xi_{rj})\right\} \left\{\frac{1}{n} \sum_{l=1}^n (\hat{\xi}_{kl} - \xi_{kl})\right\} \\ &\xrightarrow{p} 0. \end{aligned}$$

For  $\sqrt{R}T_N^*$ , we shall show  $E[(\sqrt{R}T_N^*)^2|\mathbf{Z}] = \sigma^2$ .

$$\begin{aligned} E[(\sqrt{R}T_N^*)^2|\mathbf{Z}] &= E\left[\sum_{r=1}^R (W_r^* - \bar{W}^*)\frac{1}{n} \sum_{j=1}^n \{(2A_r - 1)\{1 + M^{-1}K_M(r, j)\}e_{rj} + \xi_{rj}\}\right]^2 \\ &= RE[(W_1^* - \bar{W}^*)^2] \frac{1}{R} \sum_{r=1}^R E\left[\frac{1}{n} \sum_{j=1}^n \{(2A_r - 1)\{1 + M^{-1}K_M(r, j)\}e_{rj} + \xi_{rj}\}\right]^2 \\ &\quad + R(R-1) \sum_{r, j \neq k, l} E[(W_1^* - \bar{W}^*)(W_2^* - \bar{W}^*)] \\ &\quad \times \frac{1}{R(R-1)} E\left[\frac{1}{n} \sum_{j=1}^n \{(2A_r - 1)\{1 + M^{-1}K_M(r, j)\}e_{rj} + \xi_{rj}\}\right] \\ &\quad \times E\left[\frac{1}{n} \sum_{k=1}^n \{(2A_k - 1)\{1 + M^{-1}K_M(k, l)\}e_{kl} + \xi_{kl}\}\right] \\ &\xrightarrow{p} \sigma^2 \end{aligned}$$

since  $RE[(W_1^* - \bar{W}^*)^2] = O(1)$ ,  $R(R-1)E[(W_1^* - \bar{W}^*)(W_2^* - \bar{W}^*)] = O(1)$ , and  $\sigma^2$  is the variance of the debiased matching estimator  $\tilde{\tau}$ . Therefore, it is enough to show  $E\left[\left\{\sum_{r=1}^R W_r^*(\tilde{\tau}_r - \tilde{\tau})\right\}^2\right] \xrightarrow{p} \sigma^2$ .

## S4 Cluster weighted bootstrap for the average treatment effect on the treated

According to Theorem 2, under certain conditions, the bias-corrected estimator for the average treatment effect on the treated is asymptotically normal, i.e.,

$$\frac{\sqrt{N_1}(\hat{\tau}^t - \tau^t)}{\sigma^t} \xrightarrow{d} N(0,1),$$

where

$$\begin{aligned}(\sigma^t)^2 &= (\sigma_1^t)^2 + (\sigma_2^t)^2, \\(\sigma_1^t)^2 &= \frac{1}{N_1} \sum_{i=1}^N \sum_{r=1}^R \{A_r - (1 - A_r)M^{-1}K_M(i, r)\}^2 \sigma^2(X_{ir}, Z_r, A_r), \\(\sigma_2^t)^2 &= E[\{(\mu(X_{ir}, Z_r, 1) - \mu(X_{ir}, Z_r, 0)) - \tau^t\}^2 | A_r = 1].\end{aligned}$$

With bias correction, we rewrite our bias-corrected estimator  $\hat{\tau}^t = \hat{\tau}_{\text{mat}}^t - \hat{B}_M^t$ ,

$$\begin{aligned}\hat{\tau}^t &= \frac{1}{N_1} \sum_{i=1}^N \sum_{r=1}^R [A_r \{Y_{ir} - \hat{\mu}(X_{ir}, Z_r, 1 - A_r)\}] + (1 - A_r) \frac{K_M(i, r)}{M} \{Y_{ir} - \hat{\mu}(X_{ir}, Z_r, A_r)\} \\&= \frac{1}{N_1} \sum_{i=1}^N \hat{\tau}_i^t\end{aligned}$$

Then with suitable generated weights  $\{W_i^*\}_{i=1}^N$ ,

$$\sqrt{N_1}(\hat{\tau}^t - \tau^t) = \sum_{i=1}^N W_i^*(\hat{\tau}_i^t - \tau^t) \xrightarrow{d} N(0, (\sigma^t)^2).$$

Applying to our clustered data, we proposed the following cluster weighted bootstrap method on variance estimation for the average treatment effect on the treated.

- **Step 1'**: Obtain the weighted bootstrap samples  $\{\hat{\tau}_{i|j=1}^N\}$  based on the matching estimator framework.
- **Step 2'**: For clustered data with  $N$  observations and  $R$  non-overlapped clusters, sample  $R$  clusters with replacement.
- **Step 3'**: Include all  $\{\hat{\tau}_{i|j=1}^N\}$  within selected clusters and calculate their corresponding weights  $\{W_i^*\}_{i=1}^N$ . One option of generating weights is to set  $W_i^* = M_i^*/\sqrt{N}$ , where  $(M_1^*, \dots, M_N^*)$  is a vector from a multinomial distribution with equal probability.
- **Step 4'**: Obtain a bootstrap replicate as  $\hat{\tau}_b^* = \sum_{i=1}^N W_i^*(\hat{\tau}_i - \hat{\tau})$ .

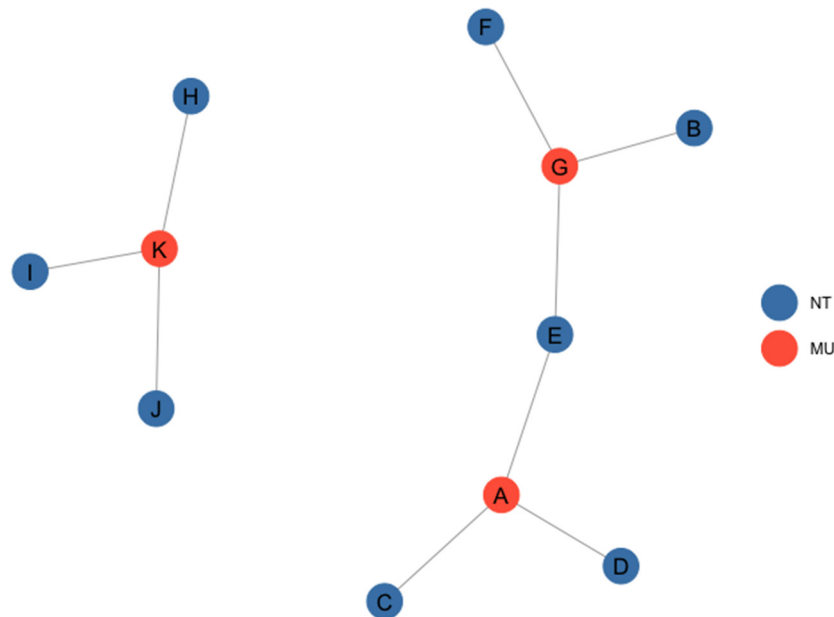

**Figure S1:** A hypothetical example of 1:3 matching of no-take (NT) and multi-use (MT) sites.

- **Step 5'**: Repeat the Step 1'-4' for  $B$  times. Compute the bootstrap variance estimator for the bias-corrected matching estimator  $\hat{\tau}$  as the empirical variance of  $\{\hat{\tau}_b^*\}_{b=1}^B$ .

## S5 Extension to unit-level treatment assignments

Although we focus on the case with cluster treatment assignments (i.e., sites within a cluster receive the same treatment), our framework extends readily to the case with unit-level treatment assignments (i.e., sites with a

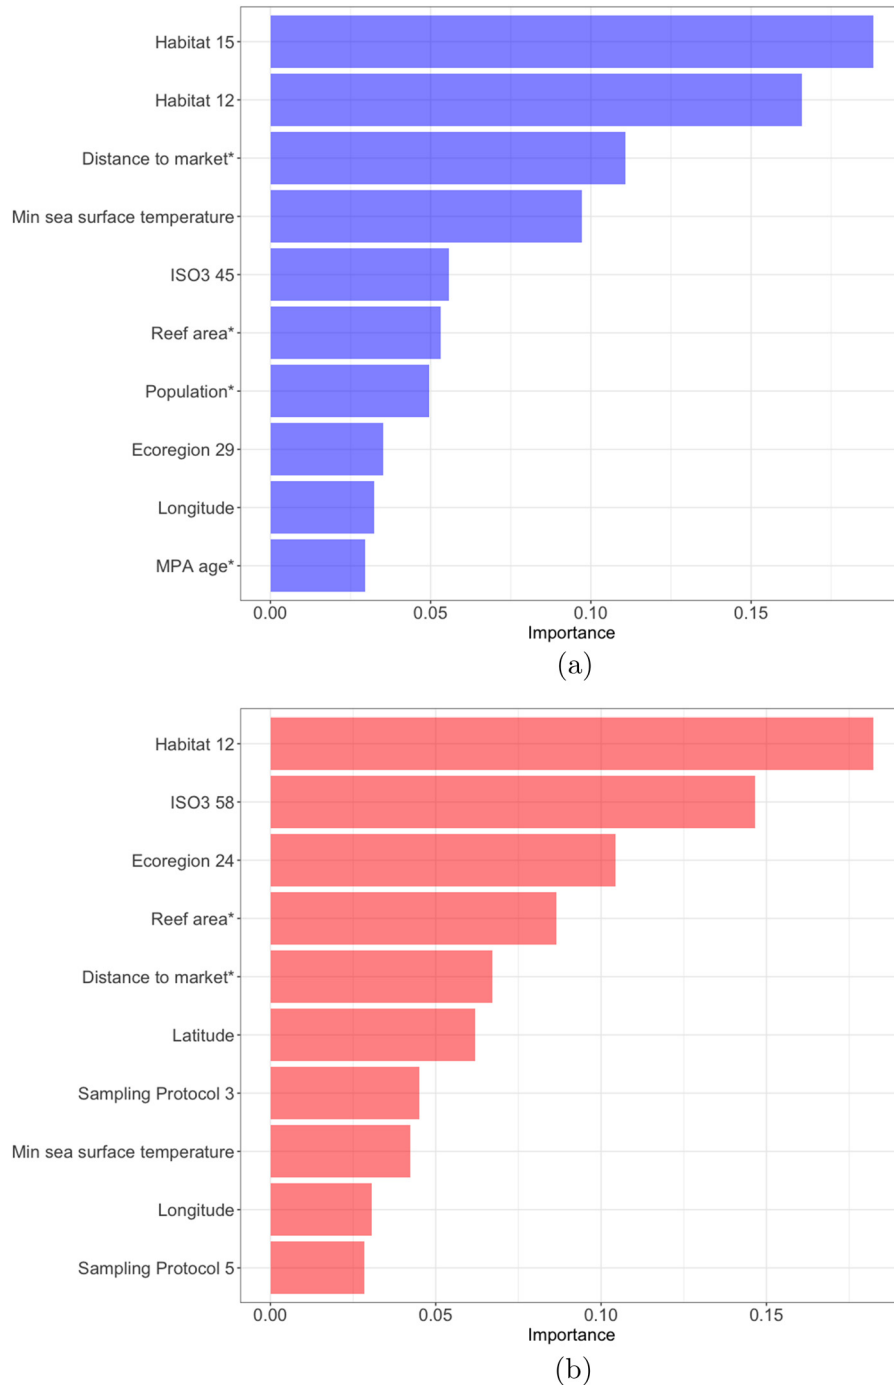

**Figure S2:** Top 10 important covariates under different marine protected area policies by regression forest (\*indicates Box-Cox transformation for the covariate). (a) Multi-use and (b) no-take.

cluster can receive different treatments). In the motivating application, most MPAs have cluster treatment, but some MPAs have a few, although a small number of sites under a different policy from most sites. It is because some MPAs contain multiple zones with different regulations [5]. To accommodate this situation, it is sufficient to make simple modifications for applying the above method, theory, and inference. First, we change the cluster-level treatment  $A_r$  to the unit-level treatment  $A_{ir}$ . The ignorability assumptions for the ATE and ATT become the followings.

**Assumption S4.** (i)  $\{Y_{ir}(0), Y_{ir}(1)\} \perp\!\!\!\perp A_{ir} | X_{ir}, Z_r$ ; (ii)  $\eta < P(A_{ir} = 1 | X_{ir} = x, Z_r = z) < 1 - \eta$  almost surely, for some  $\eta > 0$ .

**Assumption S5.** (i)  $\{Y_{ir}(0)\} \perp\!\!\!\perp A_{ir} | X_{ir}, Z_r$ ; (ii)  $P(A_{ir} = 1 | X_{ir} = x, Z_r = z) < 1 - \eta$  almost surely, for some  $\eta > 0$ .

In the matching procedure, matching based on cluster-level confounders is insufficient to remove confounding biases. Thus we use both cluster-level and site-level confounders in matching, which is also recommended for the case with cluster treatment assignments. The role of site-level confounders removes confounding biases instead of improving the efficiency of the matching estimator.

## S6 Supplementary figures

The letters A, G, and K represent sites under the multi-use policy, while the rest of the letters represent sites under the no-take policy. With 1:3 matching, one multi-use site is matched with three no-take sites. Meanwhile, the matched no-take sites can be paired with other multi-use sites. For example, the matched no-take site E is used twice to match site A and G (Figures S1 and S2)

## References

- [1] Abadie A, Imbens GW. Bias-corrected matching estimators for average treatment effects. *J Business Econ Stat.* 2011;29(1):1–11.
- [2] Abadie A, Imbens GW. Large sample properties of matching estimators for average treatment effects. *Econometrica.* 2006;74(1):235–67.
- [3] Serfling RJ. Contributions to central limit theory for dependent variables. *Ann Math Stat.* 1968;39(4):1158–75.
- [4] Otsu T, Rai Y. Bootstrap inference of matching estimators for average treatment effects. *J Am Stat Assoc.* 2017;112(520):1720–32.
- [5] Horta e Costa B, Claudet J, Franco G, Erzini K, Caro A, Gonçalves EJ. A regulation-based classification system for Marine Protected Areas (MPAs). *Marine Policy.* 2016;72:192–8.
